# Supplementary material for: Microwave spectroscopy and quantum chemical investigation of nine low energy conformers of the 15-crown-5 ether
Source: Royal Society of Chemistry journal article supplement (doi:10.1039/c2cp41635b), 2012-01-01
Supplement: c2cp41635b.pdf [file c2cp41635b.pdf]

## Supporting information

**Table S1:** Complete list of experimental lines measured for the 15c5 rotamer assigned to the MP2 conformer IV. For each line, the table indicates the assigned rotational transition, the experimental line position,  $\nu_{exp}$ , and the difference with respect to the best-fit position of the line,  $\nu_{fit}$ , provided by the rotational constants given in Table II. Note that the similar data for conformers I, II and II can be found in ref.[19].

| $J'$ | $K'_{-1}$ | $K'_{+1}$ | $J''$ | $K''_{-1}$ | $K''_{+1}$ | $\nu_{exp}$<br>(MHz) | $\nu_{fit} - \nu_{exp}$<br>(MHz) |
|------|-----------|-----------|-------|------------|------------|----------------------|----------------------------------|
| 4    | 4         | 0         | 3     | 3          | 1          | 5120.1989            | -0.0026                          |
| 5    | 5         | 1         | 4     | 4          | 0          | 6459.7137            | -0.0039                          |
| 5    | 5         | 0         | 4     | 4          | 1          | 6463.8746            | -0.0035                          |
| 5    | 3         | 2         | 4     | 2          | 3          | 5846.3385            | -0.0076                          |
| 5    | 4         | 2         | 4     | 3          | 1          | 5803.0265            | -0.0052                          |
| 5    | 4         | 1         | 4     | 3          | 2          | 5935.3048            | 0.0158                           |
| 6    | 5         | 1         | 5     | 4          | 2          | 7240.8168            | 0.0055                           |
| 6    | 5         | 2         | 5     | 4          | 2          | 7233.7848            | 0.0009                           |
| 7    | 4         | 3         | 6     | 3          | 3          | 7233.4849            | -0.0004                          |
| 8    | 0         | 8         | 7     | 1          | 7          | 4888.8009            | -0.0037                          |
| 8    | 1         | 8         | 7     | 0          | 7          | 4889.283             | -0.0008                          |
| 8    | 2         | 7         | 7     | 1          | 6          | 5405.5537            | 0.0027                           |
| 9    | 0         | 9         | 8     | 0          | 8          | 5468.7377            | -0.0007                          |
| 9    | 1         | 9         | 8     | 0          | 8          | 5468.7609            | -0.0025                          |
| 9    | 1         | 9         | 8     | 1          | 8          | 5468.6686            | 0.0040                           |
| 9    | 0         | 9         | 8     | 1          | 8          | 5468.6362            | -0.0033                          |
| 9    | 1         | 8         | 8     | 1          | 7          | 5974.9019            | 0.0028                           |
| 9    | 2         | 8         | 8     | 2          | 7          | 5971.2628            | 0.0053                           |
| 9    | 2         | 7         | 8     | 2          | 6          | 6520.8234            | -0.0042                          |
| 9    | 2         | 7         | 8     | 3          | 6          | 6424.377             | 0.0053                           |
| 10   | 0         | 10        | 9     | 0          | 9          | 6048.3831            | -0.0120                          |
| 10   | 1         | 10        | 9     | 1          | 9          | 6048.3831            | 0.0068                           |
| 10   | 0         | 10        | 9     | 1          | 9          | 6048.3831            | 0.0131                           |
| 10   | 1         | 10        | 9     | 0          | 9          | 6048.3831            | -0.0183                          |
| 10   | 1         | 9         | 9     | 2          | 8          | 6551.0146            | 0.0050                           |
| 10   | 2         | 9         | 9     | 1          | 8          | 6552.993             | 0.0035                           |
| 10   | 3         | 8         | 9     | 2          | 7          | 7088.4745            | -0.0078                          |
| 10   | 2         | 8         | 9     | 3          | 7          | 7040.3941            | -0.0001                          |
| 10   | 3         | 8         | 9     | 2          | 7          | 7088.4817            | -0.0006                          |
| 11   | 0         | 11        | 10    | 1          | 10         | 6628.0824            | 0.0013                           |
| 11   | 1         | 11        | 10    | 0          | 10         | 6628.0824            | -0.0065                          |
| 11   | 1         | 10        | 10    | 2          | 9          | 7130.9368            | 0.0020                           |
| 11   | 2         | 10        | 10    | 1          | 9          | 7131.4969            | 0.0013                           |
| 12   | 1         | 12        | 11    | 0          | 11         | 7207.7892            | -0.0049                          |
| 12   | 0         | 12        | 11    | 1          | 11         | 7207.7892            | -0.0030                          |
| 12   | 1         | 11        | 11    | 2          | 10         | 7710.5171            | -0.0025                          |
| 12   | 2         | 11        | 11    | 1          | 10         | 7710.6737            | 0.0001                           |
| 13   | 1         | 12        | 12    | 2          | 11         | 8290.0702            | 0.0126                           |
| 13   | 2         | 12        | 12    | 1          | 11         | 8290.0864            | -0.0125                          |
| 13   | 2         | 11        | 12    | 3          | 10         | 8795.2702            | 0.0001                           |
| 13   | 3         | 11        | 12    | 2          | 10         | 8796.8322            | -0.0001                          |
| 13   | 0         | 13        | 12    | 0          | 12         | 7787.5087            | 0.0021                           |
| 13   | 1         | 13        | 12    | 1          | 12         | 7787.5087            | 0.0024                           |
| 14   | 0         | 14        | 13    | 1          | 13         | 8367.2237            | 0.0011                           |
| 14   | 1         | 14        | 13    | 0          | 13         | 8367.2238            | 0.0011                           |
| 14   | 2         | 12        | 13    | 3          | 11         | 9374.4827            | -0.0007                          |
| 14   | 3         | 12        | 13    | 2          | 11         | 9374.9415            | -0.0008                          |
| 14   | 0         | 14        | 13    | 1          | 13         | 8367.2232            | 0.0006                           |
| 14   | 1         | 14        | 13    | 0          | 13         | 8367.2232            | 0.0005                           |

**Table S2:** Same as Table S1 for the 15c5 rotamer assigned to the MP2 conformer V.

| $J'$ | $K'_{-1}$ | $K'_{+1}$ | $J''$ | $K''_{-1}$ | $K''_{+1}$ | $\nu_{exp}$<br>(MHz) | $\nu_{fit} - \nu_{exp}$<br>(MHz) |
|------|-----------|-----------|-------|------------|------------|----------------------|----------------------------------|
| 8    | 0         | 8         | 7     | 1          | 7          | 4972.9013            | 0.0002                           |
| 8    | 1         | 8         | 7     | 0          | 7          | 4972.9013            | -0.0085                          |
| 8    | 3         | 5         | 7     | 3          | 4          | 6591.4177            | 0.0001                           |
| 9    | 1         | 9         | 8     | 1          | 8          | 5562.9493            | -0.0022                          |
| 9    | 0         | 9         | 8     | 0          | 8          | 5562.9493            | -0.0031                          |
| 9    | 2         | 8         | 8     | 2          | 7          | 6068.1234            | 0.0056                           |
| 9    | 1         | 8         | 8     | 1          | 7          | 6068.1924            | -0.0177                          |
| 10   | 1         | 10        | 9     | 1          | 9          | 6153.0145            | 0.0099                           |
| 10   | 0         | 10        | 9     | 0          | 9          | 6153.0145            | 0.0098                           |
| 10   | 2         | 9         | 9     | 2          | 8          | 6658.0169            | 0.0038                           |
| 10   | 1         | 9         | 9     | 1          | 8          | 6658.0329            | 0.0041                           |
| 11   | 1         | 11        | 10    | 1          | 10         | 6743.0569            | -0.0032                          |
| 11   | 0         | 11        | 10    | 0          | 10         | 6743.0569            | -0.0032                          |
| 12   | 0         | 12        | 11    | 0          | 11         | 7333.1138            | -0.0026                          |
| 12   | 1         | 12        | 11    | 1          | 11         | 7333.1138            | -0.0026                          |
| 12   | 2         | 11        | 11    | 2          | 10         | 7837.9294            | 0.00778                          |
| 12   | 1         | 11        | 11    | 1          | 10         | 7837.9294            | 0.00737                          |
| 13   | 0         | 13        | 12    | 0          | 12         | 7923.1694            | -0.0030                          |
| 13   | 1         | 13        | 12    | 1          | 12         | 7923.1694            | -0.0030                          |
| 13   | 1         | 12        | 12    | 1          | 11         | 8427.9236            | 0.0044                           |
| 13   | 2         | 12        | 12    | 2          | 11         | 8427.9236            | 0.0045                           |
| 12   | 3         | 10        | 11    | 3          | 9          | 8343.8344            | 0.0030                           |
| 12   | 2         | 10        | 11    | 2          | 9          | 8343.8521            | -0.0038                          |
| 14   | 0         | 14        | 13    | 0          | 13         | 8513.2251            | -0.0020                          |
| 14   | 1         | 14        | 13    | 1          | 13         | 8513.2251            | -0.0020                          |
| 14   | 1         | 13        | 13    | 1          | 12         | 9017.935             | 0.0022                           |
| 14   | 2         | 13        | 13    | 2          | 12         | 9017.935             | 0.0022                           |
| 15   | 0         | 15        | 14    | 0          | 14         | 9103.2816            | 0.0017                           |
| 15   | 1         | 15        | 14    | 1          | 14         | 9103.2816            | 0.0017                           |
| 15   | 1         | 14        | 14    | 1          | 13         | 9607.9535            | -0.0035                          |
| 15   | 2         | 14        | 14    | 2          | 13         | 9607.9535            | -0.0035                          |
| 16   | 0         | 16        | 15    | 0          | 15         | 9693.3334            | 0.0030                           |
| 16   | 1         | 16        | 15    | 1          | 15         | 9693.3334            | 0.0030                           |
| 16   | 1         | 15        | 15    | 1          | 14         | 10197.9834           | -0.0043                          |
| 16   | 2         | 15        | 15    | 2          | 14         | 10197.9834           | -0.0043                          |

**Table S3:** Same as TableS1 for the 15c5 rotamer assigned to the MP2 conformer VI.

| $J'$ | $K'_{-1}$ | $K'_{+1}$ | $J''$ | $K''_{-1}$ | $K''_{+1}$ | $\nu_{exp}$<br>(MHz) | $\nu_{fit} - \nu_{exp}$<br>(MHz) |
|------|-----------|-----------|-------|------------|------------|----------------------|----------------------------------|
| 8    | 0         | 8         | 7     | 1          | 7          | 4827.2339            | 0.0028                           |
| 8    | 1         | 8         | 7     | 0          | 7          | 4827.2339            | -0.0001                          |
| 9    | 0         | 9         | 8     | 1          | 8          | 5398.6527            | 0.0010                           |
| 9    | 1         | 9         | 8     | 0          | 8          | 5398.6527            | 0.00065                          |
| 10   | 0         | 10        | 9     | 1          | 9          | 5970.0766            | 0.00065                          |
| 10   | 1         | 10        | 9     | 0          | 9          | 5970.0766            | 0.0006                           |
| 11   | 0         | 11        | 10    | 1          | 10         | 6541.5014            | -0.001                           |
| 11   | 1         | 11        | 10    | 0          | 10         | 6541.5014            | -0.001                           |
| 11   | 1         | 10        | 10    | 2          | 9          | 7053.1369            | 0.0001                           |
| 11   | 2         | 10        | 10    | 1          | 9          | 7053.1369            | -0.0007                          |
| 12   | 0         | 12        | 11    | 1          | 11         | 7112.9292            | -0.0009                          |
| 12   | 1         | 12        | 11    | 0          | 11         | 7112.9292            | -0.0009                          |
| 13   | 0         | 13        | 12    | 1          | 12         | 7684.3569            | -0.0011                          |
| 13   | 1         | 13        | 12    | 0          | 12         | 7684.3569            | -0.0011                          |
| 13   | 1         | 12        | 12    | 2          | 11         | 8195.8793            | 0.0001                           |
| 14   | 0         | 14        | 13    | 0          | 13         | 8255.7854            | -0.0002                          |
| 14   | 1         | 14        | 13    | 1          | 13         | 8255.7854            | -0.0002                          |
| 15   | 0         | 15        | 14    | 0          | 14         | 8827.2131            | 0.0006                           |
| 15   | 1         | 15        | 14    | 1          | 14         | 8827.2131            | 0.0006                           |
| 16   | 0         | 16        | 15    | 0          | 15         | 9398.6391            | 0.0006                           |
| 16   | 1         | 16        | 15    | 1          | 15         | 9398.6391            | 0.0006                           |

**Table S4:** Same as TableS1 for the 15c5 rotamer assigned to the MP2 conformer VIII.

| $J'$ | $K'_{-1}$ | $K'_{+1}$ | $J''$ | $K''_{-1}$ | $K''_{+1}$ | $\nu_{exp}$<br>(MHz) | $\nu_{fit} - \nu_{exp}$<br>(MHz) |
|------|-----------|-----------|-------|------------|------------|----------------------|----------------------------------|
| 6    | 6         | 0         | 5     | 5          | 0          | 8876.4626            | -0.0043                          |
| 6    | 6         | 1         | 5     | 5          | 1          | 8876.5151            | 0.0044                           |
| 9    | 0         | 9         | 8     | 1          | 8          | 5413.5383            | 0.0062                           |
| 9    | 1         | 9         | 8     | 0          | 8          | 5417.502             | 0.0014                           |
| 10   | 0         | 10        | 9     | 1          | 9          | 5988.6335            | 0.0055                           |
| 10   | 1         | 10        | 9     | 0          | 9          | 5990.1733            | 0.0045                           |
| 11   | 0         | 11        | 10    | 1          | 10         | 6563.0417            | 0.0018                           |
| 11   | 1         | 11        | 10    | 0          | 10         | 6563.6285            | 0.0016                           |
| 11   | 1         | 10        | 10    | 2          | 9          | 7052.6752            | -0.0009                          |
| 11   | 2         | 10        | 10    | 1          | 9          | 7077.2823            | -0.0027                          |
| 12   | 0         | 12        | 11    | 1          | 11         | 7137.1919            | 0.0016                           |
| 12   | 1         | 12        | 11    | 0          | 11         | 7137.4128            | 0.0022                           |
| 13   | 1         | 13        | 12    | 0          | 12         | 7711.3279            | -0.0011                          |
| 13   | 0         | 13        | 12    | 1          | 12         | 7711.2446            | -0.0028                          |
| 14   | 1         | 14        | 13    | 0          | 13         | 8285.2987            | -0.0061                          |
| 14   | 0         | 14        | 13    | 1          | 13         | 8285.2696            | -0.0053                          |

**Table S5:** Same as TableS1 for the 15c5 rotamer assigned to the MP2 conformer IX.

| $J'$ | $K'_{-1}$ | $K'_{+1}$ | $J''$ | $K''_{-1}$ | $K''_{+1}$ | $\nu_{exp}$<br>(MHz) | $\nu_{fit} - \nu_{exp}$<br>(MHz) |
|------|-----------|-----------|-------|------------|------------|----------------------|----------------------------------|
| 7    | 0         | 7         | 6     | 1          | 6          | 4160.421             | 0.0016                           |
| 7    | 1         | 7         | 6     | 0          | 6          | 4177.9751            | 0.0025                           |
| 8    | 0         | 8         | 7     | 1          | 7          | 4725.0798            | -0.0020                          |
| 8    | 1         | 8         | 7     | 0          | 7          | 4731.9004            | 0.00032                          |
| 9    | 0         | 9         | 8     | 1          | 8          | 5286.6342            | -0.0026                          |
| 9    | 1         | 9         | 8     | 0          | 8          | 5289.2043            | 0.0018                           |
| 10   | 0         | 10        | 9     | 1          | 9          | 5846.9525            | -0.0020                          |
| 10   | 1         | 10        | 9     | 0          | 9          | 5847.8965            | -0.0005                          |
| 10   | 1         | 9         | 9     | 2          | 8          | 6335.4152            | -0.0008                          |
| 10   | 2         | 9         | 9     | 1          | 8          | 6372.5247            | 0.0035                           |
| 11   | 0         | 11        | 10    | 1          | 10         | 6406.8078            | 0.0013                           |
| 11   | 1         | 11        | 10    | 0          | 10         | 6407.1473            | 0.0010                           |
| 11   | 3         | 8         | 10    | 4          | 7          | 7075.7899            | 0.0002                           |
| 12   | 0         | 12        | 11    | 1          | 11         | 6966.4922            | -0.0014                          |
| 12   | 1         | 12        | 11    | 0          | 11         | 6966.6148            | 0.0005                           |
| 12   | 1         | 11        | 11    | 2          | 10         | 7467.6384            | -0.0011                          |
| 12   | 2         | 11        | 11    | 1          | 10         | 7473.8215            | -0.0008                          |
| 13   | 0         | 13        | 12    | 1          | 12         | 7526.1279            | 0.0005                           |
| 13   | 1         | 13        | 12    | 0          | 12         | 7526.1701            | 0.0004                           |
| 13   | 1         | 12        | 12    | 2          | 11         | 8028.4676            | -0.0017                          |
| 14   | 0         | 14        | 13    | 1          | 13         | 8085.7459            | -0.0012                          |
| 14   | 1         | 14        | 13    | 0          | 13         | 8085.7603            | -0.0015                          |
| 15   | 0         | 15        | 14    | 1          | 14         | 8645.3646            | -0.0009                          |
| 15   | 1         | 15        | 14    | 0          | 14         | 8645.3734            | 0.0029                           |
| 16   | 0         | 16        | 15    | 1          | 15         | 9204.9878            | 0.0018                           |
| 16   | 1         | 16        | 15    | 0          | 15         | 9204.9878            | 0.0001                           |

**Table S6:** Atomic cartesian coordinates ( $x, y, z$ , in Å) for the nine lowest energy conformers of 15-crown-5 predicted by the MP2/6-311++G(d,p) computation.

| atom | Conformer I |        |        | Conformer II |        |        | Conformer III |        |        | Conformer IV |        |        | Conformer V |        |        |
|------|-------------|--------|--------|--------------|--------|--------|---------------|--------|--------|--------------|--------|--------|-------------|--------|--------|
| C    | 0.707       | 0.143  | -0.384 | 0.089        | 0.004  | -0.007 | -0.002        | -0.004 | -0.008 | -0.427       | -1.815 | -0.718 | -0.069      | 0.079  | 0.107  |
| C    | 0.567       | 0.238  | 1.118  | 0.031        | 0.047  | 1.508  | -0.006        | 0.096  | 1.506  | -0.386       | -1.547 | 0.773  | 0.666       | -0.611 | 1.248  |
| O    | 0.980       | -0.989 | 1.690  | 1.291        | 0.016  | 2.155  | 1.338         | 0.010  | 1.980  | 0.350        | -0.386 | 1.106  | 1.755       | 0.159  | 1.738  |
| C    | 0.986       | -0.936 | 3.100  | 1.936        | -1.255 | 2.145  | 1.825         | 1.160  | 2.642  | 1.750        | -0.606 | 1.282  | 1.393       | 1.224  | 2.606  |
| C    | 1.605       | -2.216 | 3.614  | 3.074        | -1.309 | 1.149  | 2.265         | 2.266  | 1.702  | 2.313        | 0.676  | 1.862  | 1.820       | 2.554  | 2.022  |
| O    | 2.949       | -2.246 | 3.181  | 4.144        | -0.519 | 1.659  | 1.122         | 2.865  | 1.118  | 3.680        | 0.444  | 2.206  | 0.988       | 2.819  | 0.913  |
| C    | 3.626       | -3.433 | 3.552  | 5.179        | -0.301 | 0.720  | 1.473         | 3.910  | 0.233  | 4.577        | 1.452  | 1.779  | 1.436       | 3.900  | 0.121  |
| C    | 4.918       | -3.515 | 2.757  | 4.890        | 0.826  | -0.254 | 0.209         | 4.499  | -0.344 | 5.106        | 1.196  | 0.381  | 0.509       | 4.014  | -1.064 |
| O    | 4.742       | -3.920 | 1.411  | 4.027        | 0.370  | -1.288 | -0.307        | 3.623  | -1.329 | 4.033        | 1.289  | -0.536 | -0.734      | 4.528  | -0.606 |
| C    | 4.138       | -2.954 | 0.547  | 3.599        | 1.436  | -2.114 | -1.602        | 4.030  | -1.740 | 4.439        | 1.017  | -1.864 | -1.788      | 4.361  | -1.538 |
| C    | 2.743       | -3.425 | 0.177  | 2.712        | 0.886  | -3.213 | -2.085        | 3.145  | -2.871 | 3.204        | 0.753  | -2.692 | -2.604      | 3.111  | -1.272 |
| O    | 2.198       | -2.510 | -0.757 | 1.506        | 0.345  | -2.693 | -2.335        | 1.818  | -2.449 | 2.729        | -0.538 | -2.367 | -1.825      | 1.959  | -1.544 |
| C    | 0.883       | -2.884 | -1.132 | 1.530        | -1.073 | -2.577 | -1.231        | 0.944  | -2.647 | 1.476        | -0.808 | -2.960 | -2.596      | 0.776  | -1.403 |
| C    | 0.195       | -1.715 | -1.811 | 0.293        | -1.529 | -1.824 | -1.473        | -0.306 | -1.824 | 1.042        | -2.198 | -2.529 | -1.703      | -0.447 | -1.532 |
| O    | -0.282      | -0.743 | -0.895 | 0.362        | -1.331 | -0.421 | -1.353        | -0.101 | -0.428 | 0.839        | -2.299 | -1.131 | -1.068      | -0.837 | -0.330 |
| H    | 0.556       | 1.141  | -0.820 | -0.885       | 0.320  | -0.412 | 0.556         | -0.904 | -0.307 | -1.209       | -2.559 | -0.944 | -0.509      | 1.025  | 0.430  |
| H    | 1.713       | -0.210 | -0.622 | 0.857        | 0.694  | -0.371 | 0.489         | 0.881  | -0.426 | -0.681       | -0.875 | -1.226 | 0.634       | 0.298  | -0.707 |
| H    | 1.203       | 1.059  | 1.486  | -0.419       | 1.000  | 1.803  | -0.571        | -0.742 | 1.925  | -1.410       | -1.372 | 1.121  | -0.039      | -0.849 | 2.056  |
| H    | -0.478      | 0.456  | 1.383  | -0.611       | -0.769 | 1.868  | -0.474        | 1.036  | 1.814  | 0.016        | -2.427 | 1.294  | 1.096       | -1.548 | 0.884  |
| H    | 1.584       | -0.081 | 3.452  | 2.337        | -1.419 | 3.151  | 2.699         | 0.829  | 3.213  | 1.915        | -1.432 | 1.990  | 1.898       | 1.074  | 3.570  |
| H    | -0.036      | -0.836 | 3.497  | 1.216        | -2.047 | 1.908  | 1.079         | 1.555  | 3.346  | 2.241        | -0.840 | 0.333  | 0.310       | 1.240  | 2.779  |
| H    | 1.544       | -2.239 | 4.714  | 2.740        | -0.933 | 0.182  | 2.838         | 3.017  | 2.272  | 1.754        | 0.954  | 2.765  | 1.723       | 3.346  | 2.782  |
| H    | 1.054       | -3.081 | 3.215  | 3.409        | -2.354 | 1.029  | 2.917         | 1.843  | 0.923  | 2.225        | 1.476  | 1.123  | 2.873       | 2.488  | 1.711  |
| H    | 3.009       | -4.316 | 3.328  | 6.062        | -0.026 | 1.306  | 2.024         | 4.696  | 0.775  | 4.108        | 2.444  | 1.828  | -1.405      | 4.345  | -2.568 |
| H    | 3.852       | -3.425 | 4.632  | 5.406        | -1.221 | 0.159  | 2.111         | 3.534  | -0.580 | 5.423        | 1.436  | 2.475  | -2.450      | 5.228  | -1.431 |
| H    | 5.561       | -4.277 | 3.207  | 5.835        | 1.183  | -0.695 | 0.431         | 5.481  | -0.792 | 5.547        | 0.189  | 0.342  | 0.379       | 3.022  | -1.510 |
| H    | 5.432       | -2.545 | 2.811  | 4.419        | 1.655  | 0.294  | -0.519        | 4.640  | 0.466  | 5.888        | 1.937  | 0.144  | 0.946       | 4.696  | -1.810 |
| H    | 4.082       | -1.973 | 1.026  | 4.465        | 1.945  | -2.569 | -1.578        | 5.076  | -2.091 | 5.084        | 0.128  | -1.896 | 2.461       | 3.711  | -0.235 |
| H    | 4.754       | -2.886 | -0.355 | 3.034        | 2.171  | -1.521 | -2.304        | 3.955  | -0.897 | 4.995        | 1.873  | -2.278 | 1.428       | 4.838  | 0.696  |
| H    | 2.110       | -3.460 | 1.073  | 2.439        | 1.707  | -3.886 | -3.036        | 3.550  | -3.235 | 2.444        | 1.514  | -2.461 | -3.499      | 3.126  | -1.918 |
| H    | 2.803       | -4.434 | -0.258 | 3.258        | 0.130  | -3.792 | -1.363        | 3.167  | -3.700 | 3.452        | 0.814  | -3.764 | -2.929      | 3.108  | -0.221 |
| H    | 0.300       | -3.159 | -0.242 | 1.523        | -1.528 | -3.581 | -1.160        | 0.665  | -3.711 | 0.740        | -0.051 | -2.648 | -3.372      | 0.748  | -2.185 |
| H    | 0.918       | -3.746 | -1.819 | 2.429        | -1.403 | -2.043 | -0.297        | 1.431  | -2.348 | 1.549        | -0.782 | -4.060 | -3.092      | 0.754  | -0.421 |
| H    | 0.871       | -1.265 | -2.552 | -0.593       | -1.030 | -2.242 | -0.775        | -1.093 | -2.152 | 0.131        | -2.482 | -3.078 | -0.961      | -0.266 | -2.325 |
| H    | -0.692      | -2.086 | -2.333 | 0.185        | -2.610 | -1.964 | -2.497        | -0.648 | -1.997 | 1.835        | -2.908 | -2.777 | -2.323      | -1.302 | -1.820 |

**Table S6:** Continues.

| atom | Conformer VI |        |        | Conformer VII |        |        | Conformer VIII |        |        | Conformer IX |        |        |
|------|--------------|--------|--------|---------------|--------|--------|----------------|--------|--------|--------------|--------|--------|
| C    | -0.746       | -1.109 | 1.301  | 0.035         | 0.032  | -0.013 | -0.113         | -0.949 | -0.316 | -0.006       | -0.015 | -0.022 |
| C    | -0.053       | -0.572 | 2.531  | 0.043         | 0.050  | 1.497  | 0.208          | -0.351 | 1.032  | 0.002        | 0.060  | 1.498  |
| O    | 1.281        | -0.259 | 2.188  | 1.392         | 0.009  | 1.911  | 1.569          | -0.586 | 1.341  | 1.354        | 0.023  | 1.957  |
| C    | 2.081        | 0.039  | 3.314  | 1.532         | -0.203 | 3.299  | 1.901          | -0.028 | 2.601  | 1.762        | 1.137  | 2.726  |
| C    | 3.527        | -0.134 | 2.912  | 2.986         | 0.020  | 3.644  | 3.368          | -0.267 | 2.880  | 2.199        | 2.319  | 1.884  |
| O    | 3.744        | -1.517 | 2.721  | 3.224         | 1.424  | 3.662  | 4.159          | 0.619  | 2.107  | 1.069        | 2.913  | 1.265  |
| C    | 5.020        | -1.814 | 2.183  | 4.551         | 1.793  | 3.332  | 5.232          | -0.006 | 1.421  | 1.452        | 4.038  | 0.496  |
| C    | 5.001        | -3.246 | 1.675  | 4.718         | 2.076  | 1.852  | 4.773          | -0.768 | 0.193  | 0.226        | 4.711  | -0.069 |
| O    | 4.440        | -3.389 | 0.384  | 4.611         | 0.869  | 1.123  | 4.304          | 0.163  | -0.756 | -0.293       | 3.941  | -1.136 |
| C    | 3.050        | -3.076 | 0.300  | 4.759         | 1.084  | -0.267 | 3.567          | -0.464 | -1.787 | -1.390       | 4.603  | -1.745 |
| C    | 2.592        | -3.635 | -1.041 | 4.343         | -0.167 | -1.004 | 2.997          | 0.634  | -2.666 | -1.912       | 3.775  | -2.902 |
| O    | 1.279        | -3.212 | -1.375 | 2.934         | -0.173 | -1.140 | 2.253          | 0.057  | -3.741 | -2.594       | 2.607  | -2.492 |
| C    | 0.242        | -3.936 | -0.730 | 2.457         | -1.433 | -1.570 | 0.851          | 0.231  | -3.658 | -1.762       | 1.483  | -2.202 |
| C    | -0.755       | -2.950 | -0.165 | 0.947         | -1.388 | -1.698 | 0.174          | -0.644 | -2.621 | -1.996       | 1.051  | -0.761 |
| O    | -0.173       | -2.360 | 0.982  | 0.303         | -1.299 | -0.440 | 0.437          | -0.129 | -1.328 | -1.335       | -0.181 | -0.501 |
| H    | -1.823       | -1.212 | 1.512  | 0.809         | 0.718  | -0.370 | 0.298          | -1.968 | -0.375 | 0.564        | -0.891 | -0.342 |
| H    | -0.616       | -0.405 | 0.466  | -0.947        | 0.351  | -0.391 | -1.207         | -1.007 | -0.432 | 0.462        | 0.883  | -0.441 |
| H    | -0.587       | 0.321  | 2.893  | -0.513        | -0.820 | 1.874  | -0.002         | 0.727  | 1.010  | -0.529       | -0.808 | 1.902  |
| H    | -0.074       | -1.339 | 3.319  | -0.443        | 0.968  | 1.865  | -0.438         | -0.819 | 1.793  | -0.498       | 0.974  | 1.834  |
| H    | 1.904        | 1.070  | 3.660  | 1.236         | -1.231 | 3.562  | 1.705          | 1.053  | 2.606  | 2.625        | 0.802  | 3.312  |
| H    | 1.859        | -0.652 | 4.139  | 0.910         | 0.500  | 3.872  | 1.297          | -0.501 | 3.393  | 0.971        | 1.450  | 3.421  |
| H    | 3.717        | 0.418  | 1.980  | 3.211         | -0.406 | 4.633  | 3.601          | -1.316 | 2.657  | 2.702        | 3.056  | 2.533  |
| H    | 4.186        | 0.262  | 3.701  | 3.600         | -0.468 | 2.882  | 3.565          | -0.091 | 3.947  | 2.915        | 1.976  | 1.122  |
| H    | 5.798        | -1.697 | 2.955  | 4.769         | 2.715  | 3.883  | 5.902          | 0.800  | 1.112  | 1.987        | 4.761  | 1.133  |
| H    | 5.253        | -1.140 | 1.345  | 5.268         | 1.024  | 3.650  | 5.782          | -0.683 | 2.091  | 2.119        | 3.737  | -0.325 |
| H    | 4.464        | -3.871 | 2.405  | 5.705         | 2.542  | 1.684  | 3.968          | -1.468 | 0.460  | 0.512        | 5.711  | -0.435 |
| H    | 6.029        | -3.609 | 1.584  | 3.936         | 2.781  | 1.532  | 5.619          | -1.349 | -0.213 | -0.525       | 4.833  | 0.724  |
| H    | 2.503        | -3.524 | 1.140  | 5.809         | 1.327  | -0.501 | 2.749          | -1.056 | -1.357 | -1.070       | 5.589  | -2.124 |
| H    | 2.870        | -1.997 | 0.332  | 4.124         | 1.918  | -0.600 | 4.212          | -1.125 | -2.387 | -2.199       | 4.753  | -1.014 |
| H    | 2.667        | -4.731 | -1.043 | 4.817         | -0.193 | -1.999 | 2.368          | 1.290  | -2.057 | -2.645       | 4.379  | -3.447 |
| H    | 3.249        | -3.247 | -1.823 | 4.681         | -1.043 | -0.432 | 3.813          | 1.219  | -3.101 | -1.087       | 3.533  | -3.585 |
| H    | 0.634        | -4.551 | 0.088  | 2.894         | -1.696 | -2.550 | 0.598          | 1.283  | -3.463 | -2.039       | 0.660  | -2.871 |
| H    | -0.252       | -4.594 | -1.458 | 2.731         | -2.210 | -0.841 | 0.464          | -0.043 | -4.645 | -0.707       | 1.730  | -2.356 |
| H    | -0.963       | -2.188 | -0.929 | 0.614         | -2.326 | -2.157 | -0.912         | -0.654 | -2.809 | -3.065       | 0.884  | -0.604 |
| H    | -1.697       | -3.459 | 0.096  | 0.650         | -0.559 | -2.355 | 0.554          | -1.673 | -2.710 | -1.658       | 1.840  | -0.077 |
